# Supplementary material
Source: publisher figshare collection journal article supplement (https://acs.figshare.com/ndownloader/files/3819037)
Supplement: Supplementary file 1 [file 3819037]

## Supporting Information for

### **Ion Pair Amphiphile: A Neoteric Substitute that Modulates the Physico-Chemical Properties of Biomimetic Membranes**

Pritam Guha,<sup>†</sup> Biplab Roy,<sup>†</sup> Gourab Karmakar,<sup>†</sup> Prasant Nahak,<sup>†</sup> Suraj Koirala,<sup>‡</sup>

Manish Sapkota,<sup>‡</sup> Takeshi Misono,<sup>§</sup> Kanjiro Torigoe,<sup>§</sup> Amiya Kumar Panda<sup>\*,†</sup>

<sup>†</sup>Department of Chemistry, University of North Bengal, Darjeeling – 734 013, West Bengal, India

<sup>‡</sup>Department of Pharmaceutics, Himalayan Pharmacy Institute, Majhitar, Rangpo, East Sikkim – 737136, India

<sup>§</sup>Department of Pure and Applied Chemistry, Tokyo University of Science, 2641 Yamazaki, Noda 278-8510 Japan

\*Email: akpanda1@yahoo.com

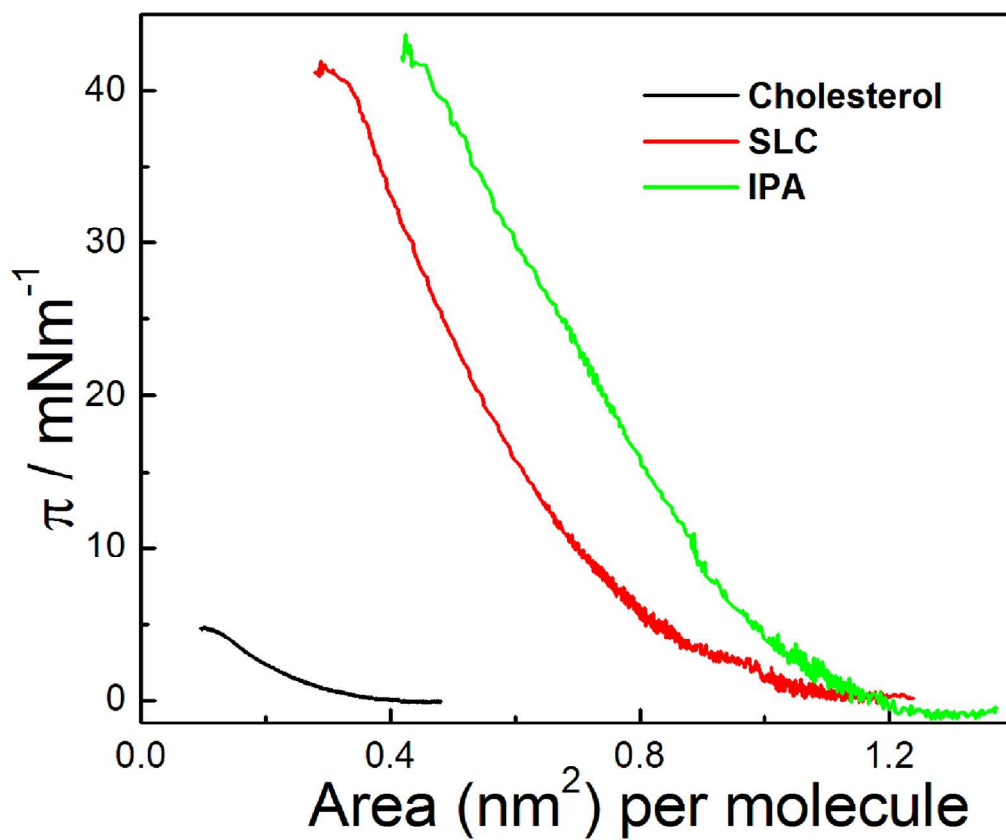

**Figure S1.** Surface pressure ( $\pi$ ) – area (A) isotherm for the monomolecular films of pure components at 25 °C, as demonstrated in Figure.

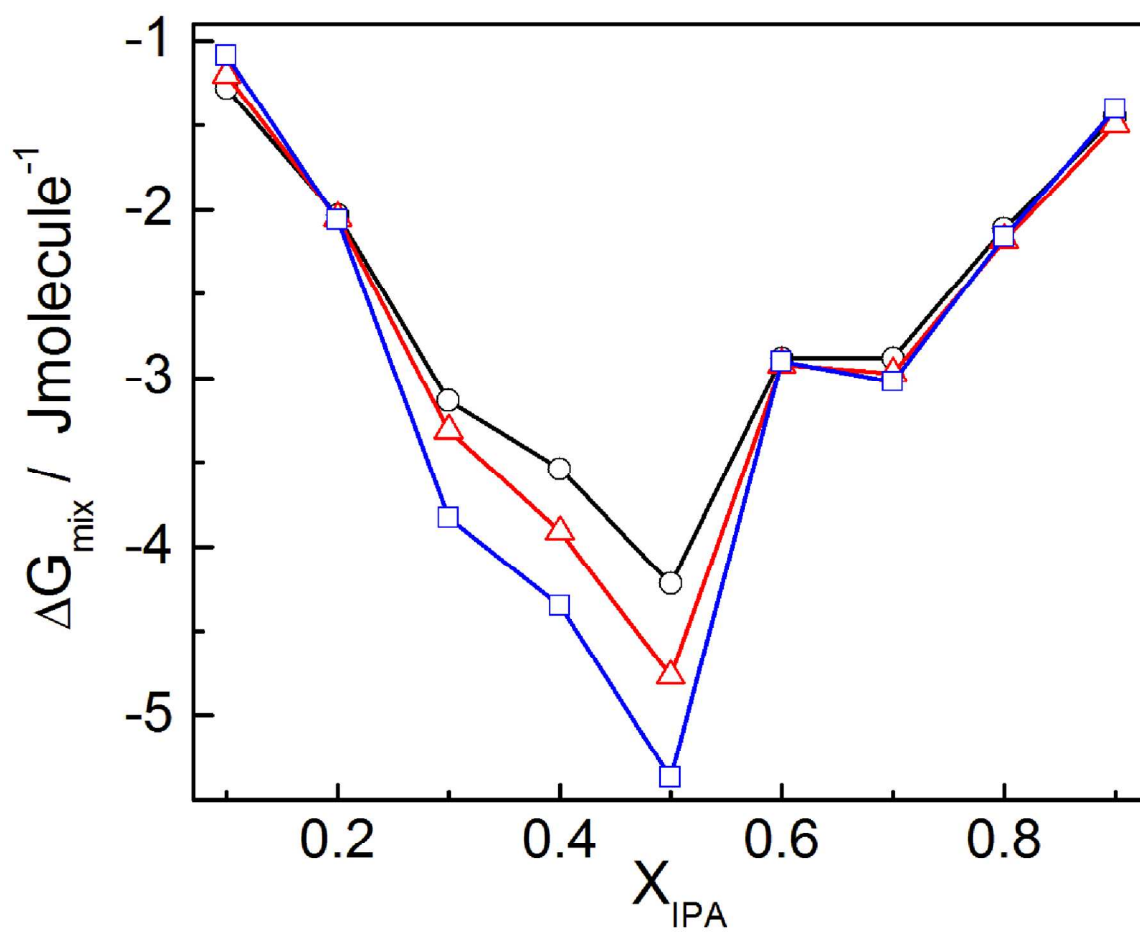

**Figure S2.** Variation of  $\Delta G_{\text{mix}}$  as a function of composition for mixed monolayers of SLC+IPA at 25 °C. Surface pressures ( $\pi / \text{mNm}^{-1}$ ) are: O, 10;  $\Delta$ , 20 and  $\square$ , 30.

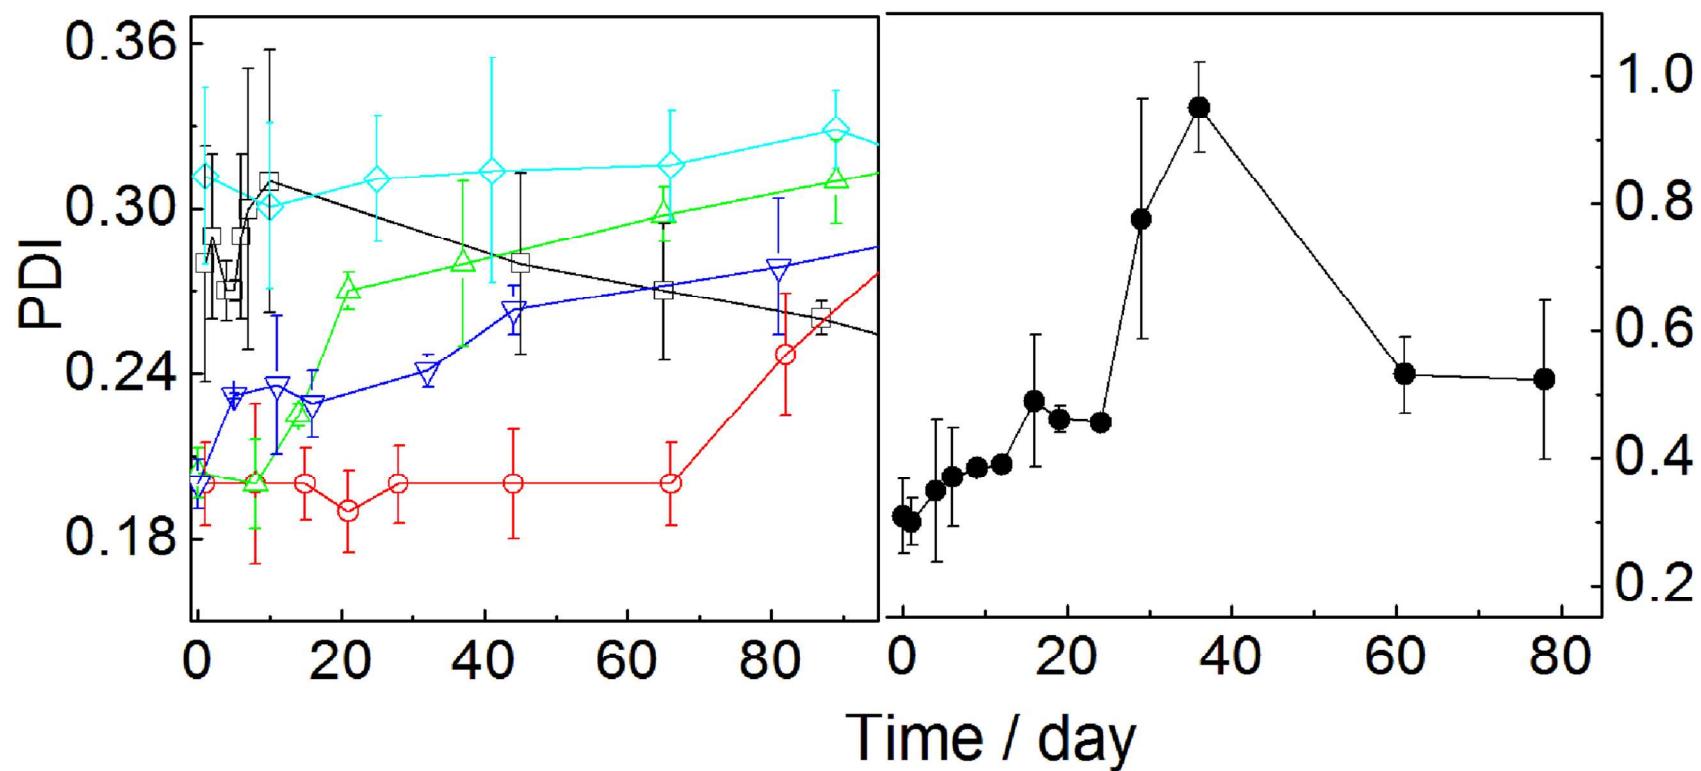

**Figure S3.** Variation of polydispersity index for the SLC+IPA (in presence of 30 mole% cholesterol) vesicles with time. Mole fraction of  $x_{IPA}$ : □, 0; ○, 0.1; △, 0.2; ▽, 0.3; ●, 0.4 and ◇, 0.5.

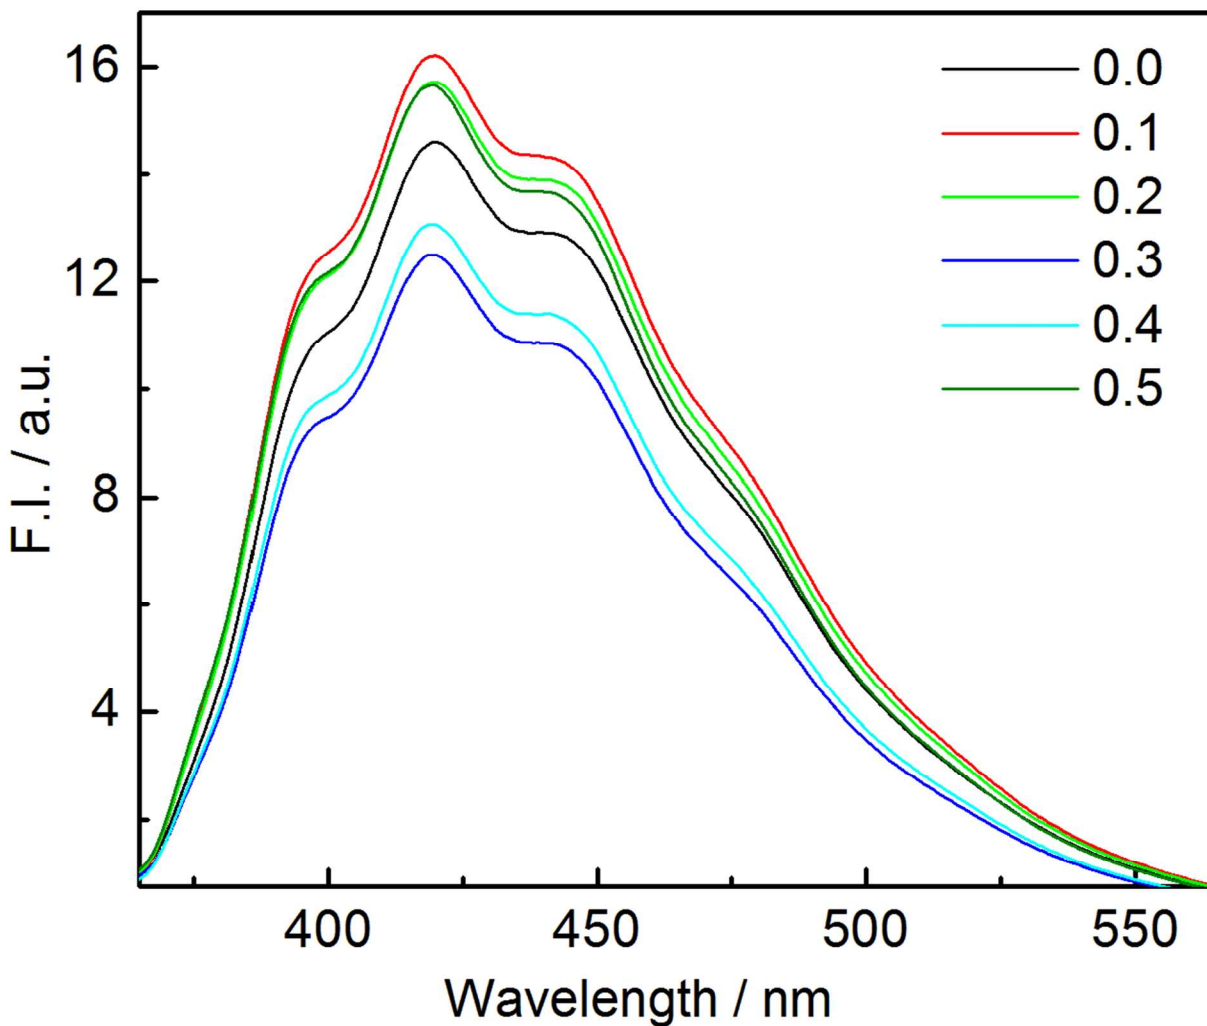

**Figure S4.** Fluorescence spectra of 10  $\mu$ M DPH in PBS buffer (pH 7.4) in vesicles of varying composition at 25  $^{\circ}$ C. Excitation wavelength ( $\lambda_{\text{ex}}$ ) = 357 nm. Mole fraction of IPA are mentioned inside the Figure.
